# Supplementary material for: The balance between the intronic miR-342 and its host gene Evl determines hematopoietic cell fate decision
Source: PubMed Central journal article supplement (PMC8478659; doi:10.1038/s41375-021-01267-5), 2021-05-21

# Supplementary Figure 1

a.

| Score          | Expect | Method                                                         | Identities   | Positives    | Gaps      |
|----------------|--------|----------------------------------------------------------------|--------------|--------------|-----------|
| 670 bits(1729) | 0.0    | Compositional matrix adjust.                                   | 391/416(94%) | 405/416(97%) | 2/416(0%) |
| Query 1        |        | MSEQSICQARASVMVYDDTSSKKWVPIKPGQQGFSRINIYHNTASNTFRVVGVKLQDQQVV  |              |              | 60        |
| Sbjct 1        |        | MSEQSICQARASVMVYDDTSSKKWVPIKPGQQGFSRINIYHNTAS+TFRVVGVKLQDQQVV  |              |              | 60        |
| Query 61       |        | INYSIVKGLKYNQATPTFHQWRDARQVYGLNFASKEEATTFSNAMLFALNIMNSQEGGGS   |              |              | 120       |
| Sbjct 61       |        | INYSIVKGLKYNQATPTFHQWRDARQVYGLNFASKEEATTFSNAMLFALNIMNSQEGGGS   |              |              | 120       |
| Query 121      |        | SQRQVQNGPSPDEMDIQRQVMEQHQQQRQESLERRTSATGPILPPGHPSSAASAPVSCS    |              |              | 180       |
| Sbjct 121      |        | +QRQVQNGPSP+EMDIQRQVMEQ Q RQESLERR SATGPILPPGHPSSAAS +SCS      |              |              | 178       |
| Query 181      |        | GPPPPPPPPVPPPPPTGATPPPPPPPLPAGGAQGGSSHDESSMSGLAAAAGAKLRRVQRPED |              |              | 240       |
| Sbjct 179      |        | GPPPPPPPPVPPPPPTG+TPPPPPPLPAGGAQGG++HDESS SGLAAA+AGAKLRRVQRPED |              |              | 238       |
| Query 241      |        | ASGGSSPSGTSKSDANRASSGGGGGGLMEEMNKLLAKRRKAASQSDKPAEKKEDESQMED   |              |              | 300       |
| Sbjct 239      |        | ASGGSSPSGTSKSDANRASSGGGGGGLMEEMNKLLAKRRKAASQ+DKPA++KEDESQ ED   |              |              | 298       |
| Query 301      |        | PSTSPSPGTRAASQPPNSSEAGRKPWERSNSVEKPVSSILSRTPSVAKSPEAKSPLQSQP   |              |              | 360       |
| Sbjct 299      |        | PSTSPSPGTRA SQPPNSSEAGRKPWERSNSVEKPVSS+LSRTPSVAKSPEAKSPLQSQP   |              |              | 358       |
| Query 361      |        | HSRMKPAGSVNDMALDAFDLDRMKQEILEEVVRELHKVKEEIIDAIRQELSGISTT       |              |              | 416       |
| Sbjct 359      |        | HSRVKPAAGSVNDVGLDALDLDRMKQEILEEVVRELHKVKEEIIDAIRQELSGISTT      |              |              | 414       |

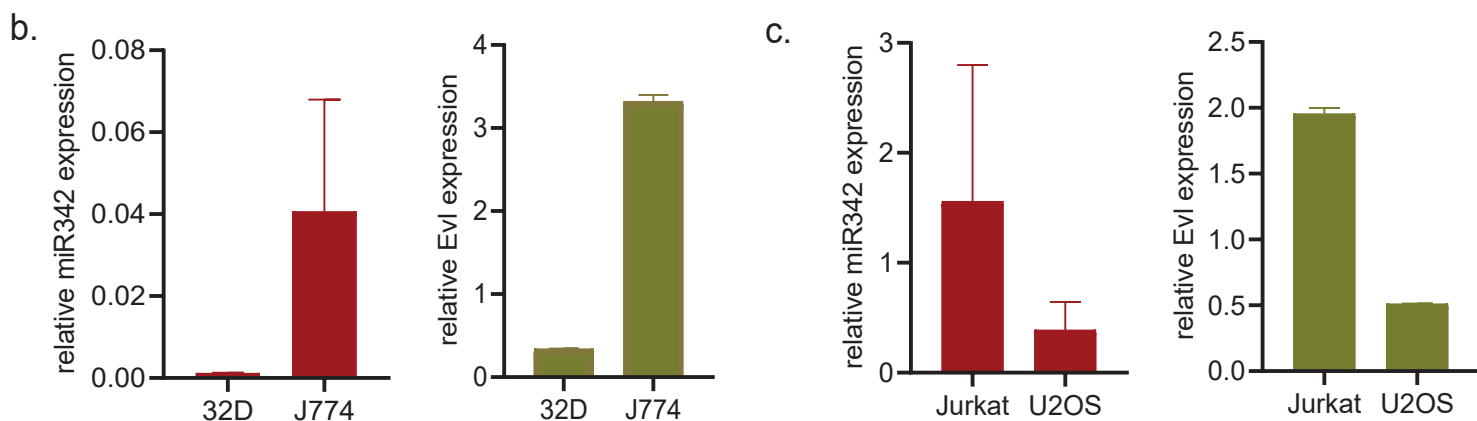

Supplement: 41375_2021_1267_MOESM5_ESM.pdf [file 41375_2021_1267_MOESM5_ESM.pdf]
