# Supplementary material for: The balance between the intronic miR-342 and its host gene Evl determines hematopoietic cell fate decision
Source: PubMed Central journal article supplement (PMC8478659; doi:10.1038/s41375-021-01267-5), 2021-05-21

# Supplementary Figure 5

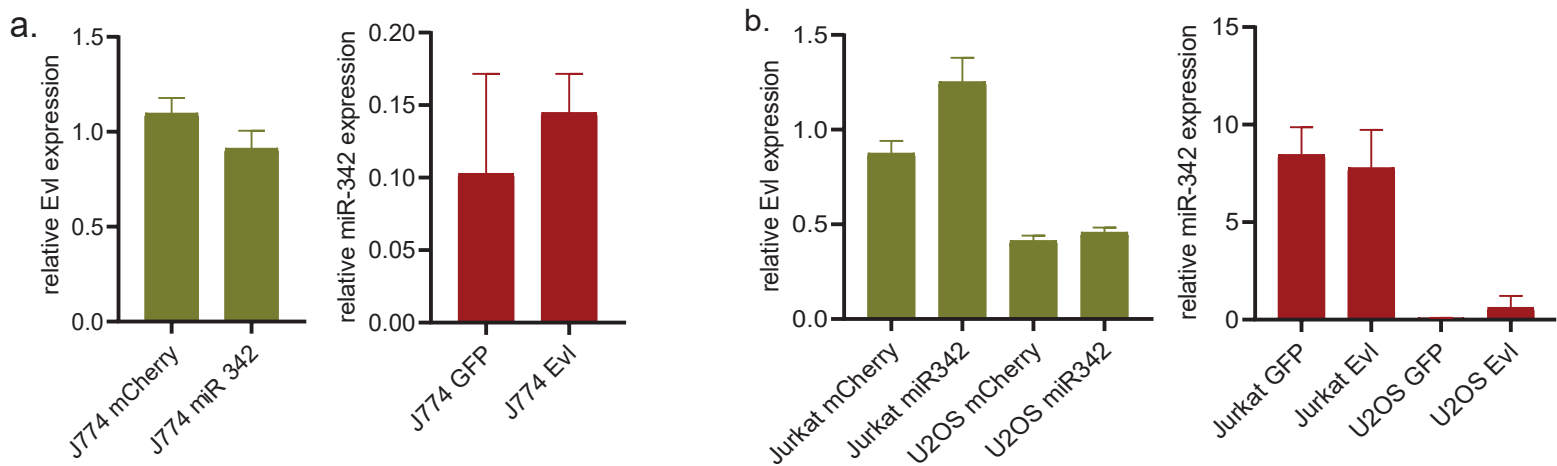

Supplement: 41375_2021_1267_MOESM9_ESM.pdf [file 41375_2021_1267_MOESM9_ESM.pdf]
